# Supplementary material for: Synthesis and characterization of a new fluorescent probe for reactive oxygen species
Source: Royal Society of Chemistry journal article supplement (doi:10.1039/b702618h), 2007-01-01
Supplement: b702618h.pdf [file b702618h.pdf]

## Supplementary Information

### Synthesis and characterization of a new fluorescent probe for reactive oxygen species.

B. Heyne, Chad Beddie and J.C. Scaiano\*

*University of Ottawa, Department of Chemistry, 10 Marie Curie, Ottawa, ON, K1N 6N5, Canada*

#### I. Nitrobenzofurazan derivatives.

##### a) NMR spectra of NBF compound

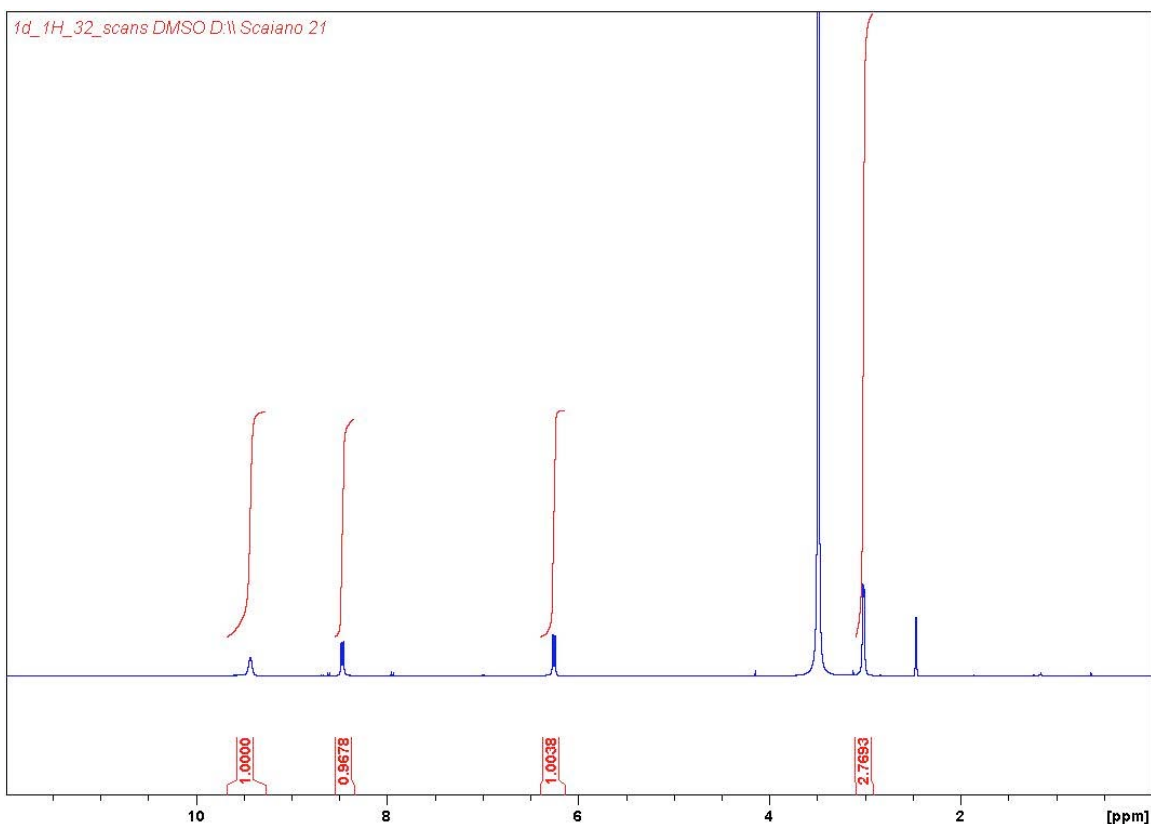

**Figure SI 1:**  $^1\text{H}$  NMR of NBF in  $\text{DMSO-d}_6$  at 298 K

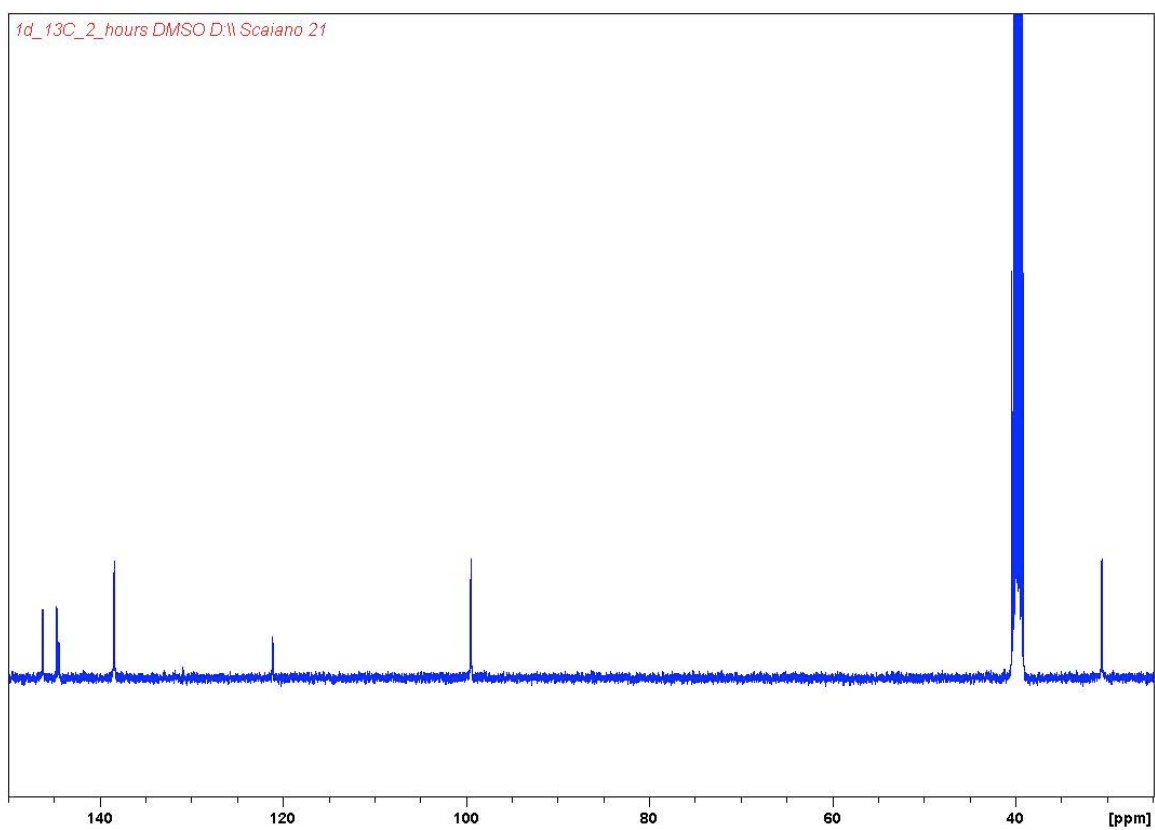

**Figure SI 2:**  $^{13}\text{C}$  NMR of NBF in DMSO- $\text{d}_6$  at 298 K

**b) NMR spectra and crystal structure of NBFhd.**

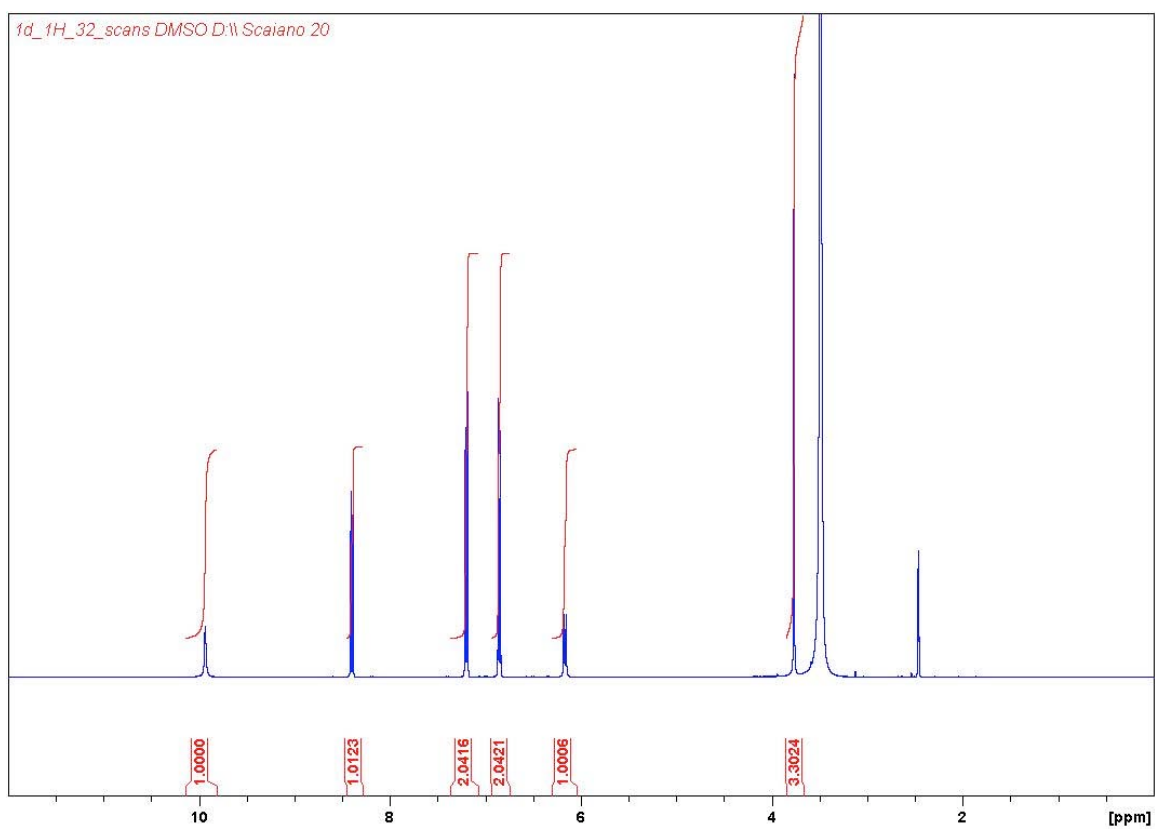

**Figure SI 3:**  $^1\text{H}$  NMR of NBFhd in  $\text{DMSO-d}_6$  at 298 K

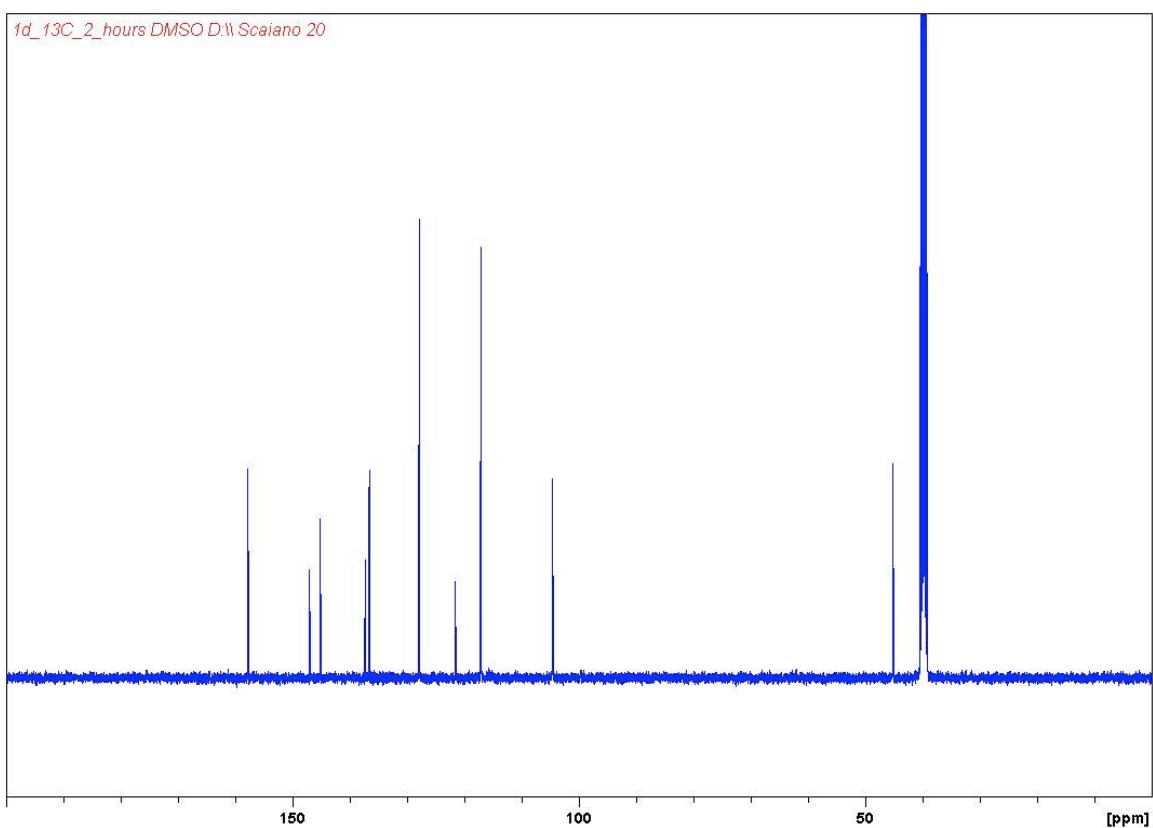

**Figure SI 4:**  $^{13}\text{C}$  NMR of NBFhd in  $\text{DMSO-d}_6$  at 298 K

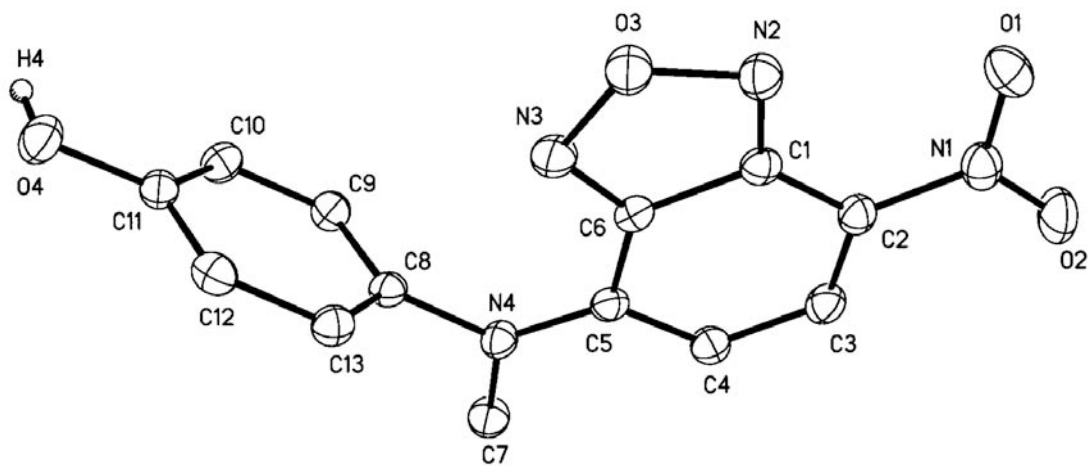

**Figure SI 5:** ORTEP diagram showing crystal structure of NBFhd

**c) Crystallographic data for NBFhd**

|                                   |                                                                                               |
|-----------------------------------|-----------------------------------------------------------------------------------------------|
| Empirical formula                 | C13 H10 N4 O4                                                                                 |
| Formula weight                    | 286.25                                                                                        |
| Temperature                       | 200 (2) K                                                                                     |
| Wavelength                        | 0.71073 Å                                                                                     |
| Crystal system, space group       | Monoclinic, P2(1)/n                                                                           |
| Unit cell dimensions              | a=8.5125 (15) Å      α=90°<br>b=14.863 (3) Å      β=92.917 (3)°<br>c=9.7571 (17) Å      γ=90° |
| Volume                            | 1232.9 (4) Å <sup>3</sup>                                                                     |
| Z, Calculated density             | 4, 1.542 Mg/m <sup>3</sup>                                                                    |
| Absorption coefficient            | 0.118 mm <sup>-1</sup>                                                                        |
| F(000)                            | 592                                                                                           |
| Crystal size                      | 0.2 x 0.15 x 0.15 mm                                                                          |
| Theta range for data collection   | 2.5 to 24.73 deg.                                                                             |
| Limiting indices                  | -9<=h<=10, -17<=k<=17, -11<=l<=11                                                             |
| Reflections collected / unique    | 8836 / 2048 [R(int) = 0.0419]                                                                 |
| Completeness to theta = 24.73     | 97.4%                                                                                         |
| Absorption correction             | Semi-empirical from equivalents                                                               |
| Max. and min. transmission        | 0.9825 and 0.9768                                                                             |
| Refinement method                 | Full-matrix least-squares on F <sup>2</sup>                                                   |
| Data / restraints / parameters    | 2048 / 0 / 192                                                                                |
| Goodness-of-fit on F <sup>2</sup> | 1.005                                                                                         |
| Final R indices [I>2sigma (I)]    | R1 = 0.0353, wR2 = 0.0830                                                                     |
| R indices (all data)              | R1 = 0.0656, wR2 = 0.0960                                                                     |
| Largest diff. peak and hole       | 0.144 and -0.134 e.Å <sup>3</sup>                                                             |

Definition of R indices:  $R1 = \sum(F_0 - F_c) / \sum(F_0)$ ;  $wR2 = [\sum[w(F_0^2 - F_c^2)^2] / \sum[w(F_0^2)^2]]^{1/2}$

## II. Chromatographic analysis of the interaction between peroxy radical and NBFhd.

### Released of NBF from the interaction between peroxy radical and NBFhd.

The interaction between peroxy radical produced by the thermal decomposition of AAPH at 40°C and NBFhd was performed by HPLC (Jasco) with fluorescence detection (model FP-1520). Briefly, a solution of NBFhd ( $5 \times 10^{-6}$  M) dissolved in PBS (15 mM  $\text{NaH}_2\text{PO}_4/\text{K}_2\text{HPO}_4$ , pH 7.4) in presence of AAPH ( $5 \times 10^{-3}$  M) was kept under air at 40°C in a water bath. The mixture was then injected without any treatment on a C-18 reverse phase column (Zorbax, SB-C18 4.6×250 mm, Agilent). An isocratic elution with a mixture of water and acetonitrile (30:70) was realized at a flow rate of 1 ml/min for 10 min. The excitation wavelength of the fluorescence detector was set at 468 nm, while the emission wavelength was 550 nm.

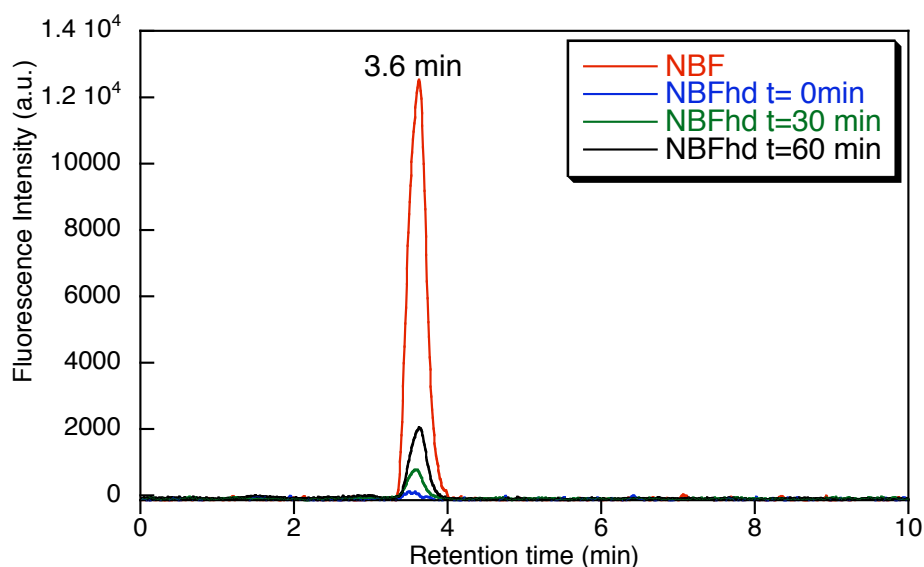

**Figure SI 6:** HPLC chromatograph with fluorescence detection of a solution of NBF  $5 \times 10^{-6}$  M and NBFhd  $5 \times 10^{-6}$  M incubated with AAPH  $5 \times 10^{-3}$  M in PBS pH for 30 and 60 min.

### Characterization of the by-products resulting from the interaction between peroxy radical and NBFhd.

The interaction between peroxy radical produced by the thermal decomposition of AAPH at 40°C and NBFhd was also performed by GC/MS. A solution of NBFhd ( $10^{-4}$  M) dissolved in PBS (15 mM  $\text{NaH}_2\text{PO}_4/\text{K}_2\text{HPO}_4$ , pH 7.4) in presence of AAPH ( $10^{-1}$  M) was kept under air at 40°C for 0 and 30 min in a water bath. The sample was acidified by addition of 20  $\mu\text{l}$  HCl (8 mM) then extracted in 1ml of chloroform. The extracted sample

was injected without further purification on the column (Agilent HP-5MS, 0.25mm\*30m\*0.25um) of the GC/MS chromatogram (Agilent technologies). The injector temperature was set at 250°C. The temperature program began at 50°C (for 10 min) and was increased up to 280°C (for 10 min) at a rate of 10°C/min. The temperature of the MS detector (Agilent, model 5973) was set at 150°C.

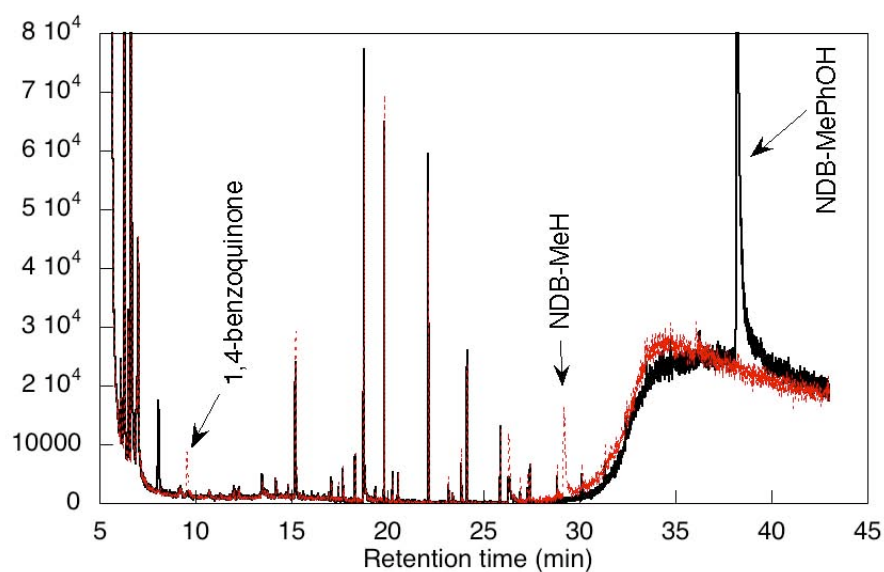

**Figure SI 7:** GC chromatogram of a solution of NBFhd ( $10^{-4}$  M) incubated in PBS pH 7.4 in presence of AAPH ( $10^{-1}$  M) at 40°C for 0 min (black trace) and 30 min (red trace), respectively.

### III. Calculated Structures.

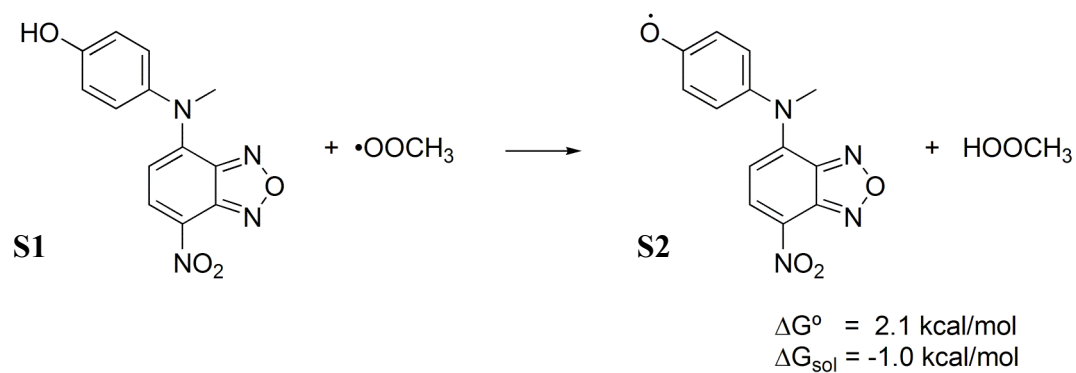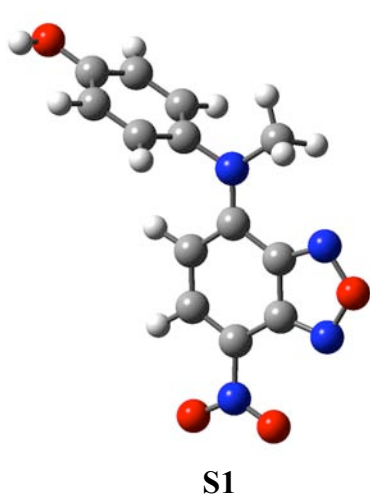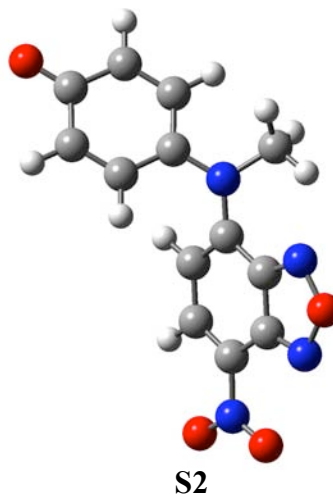

**Figure SI 8:** Calculated structures of the molecules in Figure 5.

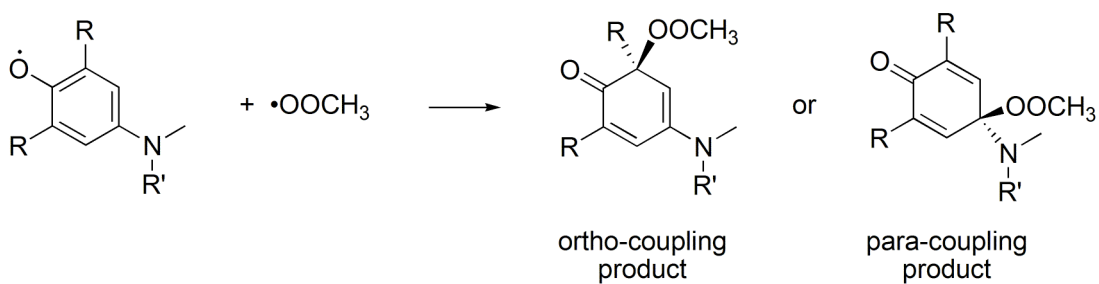

Model 2: R = H, R' = phenyl  
 Model 3: R = CH<sub>3</sub>, R' = phenyl

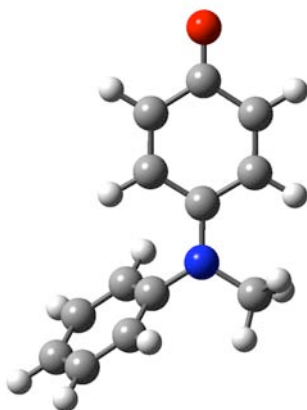

**Model 2**  
**Initial radical**

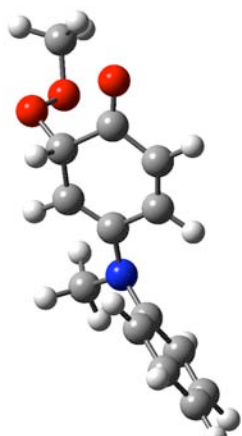

**Model 2**  
**Ortho coupling product**

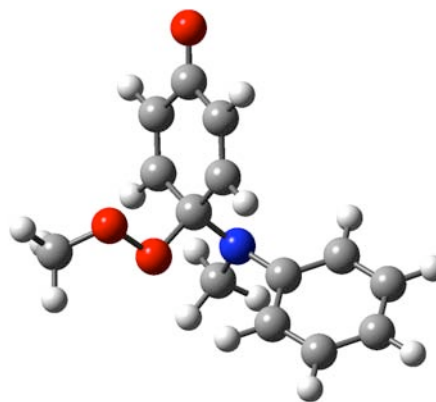

**Model 2**  
**Para coupling product**

**Figure SI 9:** Calculated structures the initial radical and the ortho and para coupling products for Model 2 described in Figure 7 in the article.

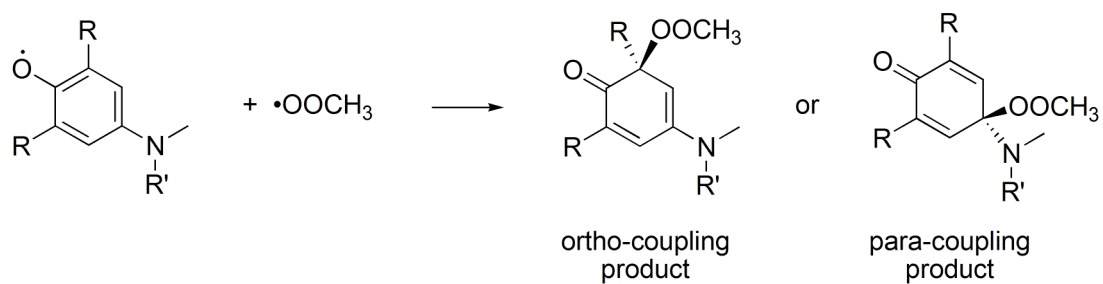

Model 2:  $\text{R} = \text{H}$ ,  $\text{R}' = \text{phenyl}$   
 Model 3:  $\text{R} = \text{CH}_3$ ,  $\text{R}' = \text{phenyl}$

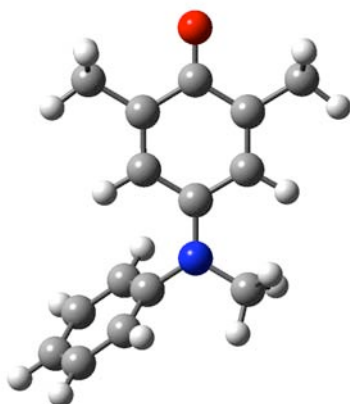

**Model 3**  
**Initial Radical**

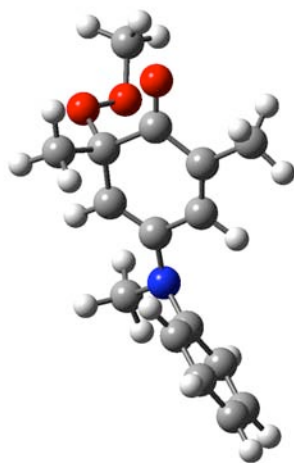

**Model 3**  
**Ortho-coupling product**

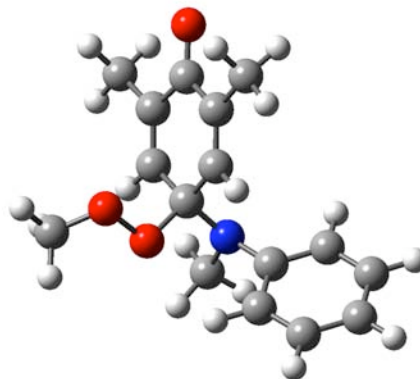

**Model 3**  
**Para-coupling product**

**Figure SI 10:** Calculated structures the initial radical and the ortho and para coupling products for the Model 3 described in Figure 7 in the article.
